# Supplementary material for: Plant SYP12 syntaxins mediate an evolutionarily conserved general immunity to filamentous pathogens
Source: eLife. 2022 Feb 4;11:e73487. doi: 10.7554/eLife.73487 (PMC8865848; doi:10.7554/eLife.73487)
Supplement: Figure 3—source data 1. [file elife-73487-fig3-data1.xlsx]

## Sheet: Fig. 3C
	Fig. 3C
	genotype	blad	papilla	total	%
	Col-0	1	95	97	97.9381	96.7939
	Col-0	2	100	101	99.0099	2.39134
	Col-0	3	100	104	96.1538
	Col-0	4	95	97	97.9381
	Col-0	5	92	99	92.9293
	fmo1-1	1	101	103	98.0583	95.6505
	fmo1-1	2	97	102	95.098	2.26236
	fmo1-1	3	95	102	93.1373
	fmo1-1	4	96	98	97.9592
	fmo1-1	5	94	100	94
	pen1-1	1	72	83	86.747	86.7309
	pen1-1	2	63	69	91.3043	5.83968
	pen1-1	3	71	81	87.6543
	pen1-1	4	71	78	91.0256
	pen1-1	5	30	39	76.9231
	fmo1-1 pen1-1	1	77	90	85.5556	87.8011
	fmo1-1 pen1-1	2	50	54	92.5926	3.53515
	fmo1-1 pen1-1	3	57	64	89.0625
	fmo1-1 pen1-1	4	35	42	83.3333
	fmo1-1 pen1-1	5	46	52	88.4615
	fmo1-1 syp122-1	1	104	108	96.2963	96.6
	fmo1-1 syp122-1	2	97	100	97	2.51578
	fmo1-1 syp122-1	3	92	99	92.9293
	fmo1-1 syp122-1	4	90	93	96.7742
	fmo1-1 syp122-1	5	109	109	100
	fmo1-1 DM	1	2	28	7.14286	2.29814
	fmo1-1 DM	2	1	23	4.34783	3.29836
	fmo1-1 DM	3	0	17	0
	fmo1-1 DM	4	0	16	0
	fmo1-1 DM	5	0	23	0

## Sheet: Fig. 3F
	Fig. 3C
	genotype	blad	papilla	total	%
	Col-0	1	60	69	86.9565	87.2667
	Col-0	2	80	90	88.8889	1.31843
	Col-0	3	65	74	87.8378
	Col-0	4	76	87	87.3563
	Col-0	5	58	68	85.2941
	fmo1-1	1	78	80	97.5	87.2355
	fmo1-1	2	58	75	77.3333	10.5518
	fmo1-1	3	82	85	96.4706
	fmo1-1	4	71	79	89.8734
	fmo1-1	5	60	80	75
	pen1-1	1	10	12	83.3333	67.1082
	pen1-1	2	9	15	60	9.24348
	pen1-1	3	9	14	64.2857
	pen1-1	4	7	11	63.6364
	pen1-1	5	9	14	64.2857
	fmo1-1 pen1-1	1	11	14	78.5714	74.0357
	fmo1-1 pen1-1	2	10	14	71.4286	4.94162
	fmo1-1 pen1-1	3	8	10	80
	fmo1-1 pen1-1	4	10	14	71.4286
	fmo1-1 pen1-1	5	11	16	68.75
	fmo1-1 syp122-1	1	76	81	93.8272	93.0027
	fmo1-1 syp122-1	2	82	91	90.1099	2.62852
	fmo1-1 syp122-1	3	56	58	96.5517
	fmo1-1 syp122-1	4	76	81	93.8272
	fmo1-1 syp122-1	5	78	86	90.6977
	fmo1-1 DM	1	0	5	0	1.66667
	fmo1-1 DM	2	1	12	8.33333	3.72678
	fmo1-1 DM	3	0	7	0
	fmo1-1 DM	4	0	2	0
	fmo1-1 DM	5	0	3	0
