# Supplementary material for: Plant SYP12 syntaxins mediate an evolutionarily conserved general immunity to filamentous pathogens
Source: eLife. 2022 Feb 4;11:e73487. doi: 10.7554/eLife.73487 (PMC8865848; doi:10.7554/eLife.73487)
Supplement: Figure 4—source data 1. [file elife-73487-fig4-data1.xlsx]

## Sheet: Fig. 4C
	Fig. 4C
	genotype	blad	encasement	penetrations	%
	pen1-1	1	55	64	85.9375	92.5002
	pen1-1	2	85	93	91.3978	5.1515
	pen1-1	3	65	66	98.4848
	pen1-1	4	53	59	89.8305
	pen1-1	5	123	127	96.8504
	fmo1-1 pen1-1	1	58	65	89.2308	87.2161
	fmo1-1 pen1-1	2	102	116	87.931	3.69614
	fmo1-1 pen1-1	3	81	93	87.0968
	fmo1-1 pen1-1	4	30	37	81.0811
	fmo1-1 pen1-1	5	49	54	90.7407
	fmo1-1 DM	1	0	26	0	0
	fmo1-1 DM	2	0	24	0	0
	fmo1-1 DM	3	0	33	0
	fmo1-1 DM	4	0	35	0
	fmo1-1 DM	5	0	23	0

## Sheet: Fig. 4E
	Fig. 4E
	genotype	blad	encasement	penetrations	%
	pen1-1	1	65	70	92.8571	95.3757
	pen1-1	2	70	72	97.2222	2.67712
	pen1-1	3	49	53	92.4528
	pen1-1	4	69	70	98.5714
	pen1-1	5	68	71	95.7746
	fmo1-1 pen1-1	1	78	84	92.8571	94.0783
	fmo1-1 pen1-1	2	72	77	93.5065	0.884089
	fmo1-1 pen1-1	3	75	79	94.9367
	fmo1-1 pen1-1	4	73	77	94.8052
	fmo1-1 pen1-1	5	66	70	94.2857
	fmo1-1 DM	1	0	50	0	0.512821
	fmo1-1 DM	2	1	39	2.5641	1.1467
	fmo1-1 DM	3	0	44	0
	fmo1-1 DM	4	0	36	0
	fmo1-1 DM	5	0	50	0

## Sheet: Fig. 4F
	Fig. 4F
	genotype	blad	pen	total	%
	Col-0	1	9	106	8.49057	7.06543
	Col-0	2	5	106	4.71698	3.08635
	Col-0	3	5	109	4.58716
	Col-0	4	13	110	11.8182
	Col-0	5	6	105	5.71429
	fmo1-1	1	13	116	11.2069	10.7784
	fmo1-1	2	11	113	9.73451	0.96969
	fmo1-1	3	11	113	9.73451
	fmo1-1	4	13	111	11.7117
	fmo1-1	5	13	113	11.5044
	pen1-1	1	145	213	68.0751	72.707
	pen1-1	2	166	225	73.7778	3.71463
	pen1-1	3	178	234	76.0684
	pen1-1	4	153	220	69.5455
	pen1-1	5	215	234	76.0684
	fmo1-1 pen1-1	1	140	213	65.7277	78.9346
	fmo1-1 pen1-1	2	207	243	85.1852	7.62062
	fmo1-1 pen1-1	3	198	243	81.4815
	fmo1-1 pen1-1	4	92	115	80
	fmo1-1 pen1-1	5	195	237	82.2785
	fmo1-1 syp122-1	1	9	110	8.18182	7.85236
	fmo1-1 syp122-1	2	12	112	10.7143	3.80175
	fmo1-1 syp122-1	3	8	115	6.95652
	fmo1-1 syp122-1	4	2	105	1.90476
	fmo1-1 syp122-1	5	13	113	11.5044
	fmo1-1 DM	1	175	203	86.2069	89.3666
	fmo1-1 DM	2	178	201	88.5572	2.46975
	fmo1-1 DM	3	186	203	91.6256
	fmo1-1 DM	4	187	203	92.1182
	fmo1-1 DM	5	174	197	88.3249
