# Supplementary material for: Plant SYP12 syntaxins mediate an evolutionarily conserved general immunity to filamentous pathogens
Source: eLife. 2022 Feb 4;11:e73487. doi: 10.7554/eLife.73487 (PMC8865848; doi:10.7554/eLife.73487)
Supplement: Figure 5—source data 1. [file elife-73487-fig5-data1.xlsx]

## Sheet: Fig. 5C
	Fig. 5C
	genotype	blad	pen	total	%
	fmo1	1	35	53	66.0377	62.6095
	fmo1	2	40	53	75.4717	10.396
	fmo1	3	29	56	51.7857
	fmo1	4	32	56	57.1429
	fmo1 pen1	1	45	57	78.9474	63.0971
	fmo1 pen1	2	34	51	66.6667	13.4164
	fmo1 pen1	3	29	62	46.7742
	fmo1 pen1	4	36	60	60
	fmo1 DM	1	9	57	15.7895	11.3663
	fmo1 DM	2	6	52	11.5385	3.22666
	fmo1 DM	3	5	51	9.80392
	fmo1 DM	4	5	60	8.33333

## Sheet: Fig. 5F
	Fig. 5F
	genotype	blad	pen	total	%
	fmo1	1	1	84	1.19048	1.74291
	fmo1	2	1	93	1.07527	2.04678
	fmo1	3	0	72	0
	fmo1	4	4	85	4.70588
	fmo1 pen1	1	2	69	2.89855	2.35554
	fmo1 pen1	2	2	88	2.27273	0.792783
	fmo1 pen1	3	2	67	2.98507
	fmo1 pen1	4	1	79	1.26582
	fmo1 syp122	1	1	80	1.25	0.3125
	fmo1 syp122	2	0	64	0	0.625
	fmo1 syp122	3	0	76	0
	fmo1 syp122	4	0	78	0
	fmo1 DM	1	59	76	77.6316	56.7845
	fmo1 DM	2	43	69	62.3188	19.9999
	fmo1 DM	3	19	64	29.6875
	fmo1 DM	4	46	80	57.5
