# Supplementary material for: Plant SYP12 syntaxins mediate an evolutionarily conserved general immunity to filamentous pathogens
Source: eLife. 2022 Feb 4;11:e73487. doi: 10.7554/eLife.73487 (PMC8865848; doi:10.7554/eLife.73487)
Supplement: Figure 6—source data 1. [file elife-73487-fig6-data1.xlsx]

## Sheet: Fig. 6C
	Fig. 6C
	genotype	blad	pen	total	%
	fmo1	1	80	86	93.0233	95.1417
	fmo1	2	83	89	93.2584	2.73712
	fmo1	3	82	86	95.3488
	fmo1	4	93	94	98.9362
	fmo1 pen1	1	96	103	93.2039	90.3352
	fmo1 pen1	2	89	105	84.7619	5.5201
	fmo1 pen1	3	59	68	86.7647
	fmo1 pen1	4	114	118	96.6102
	fmo1 DM	1	2	11	18.1818	23.355
	fmo1 DM	2	4	14	28.5714	6.90079
	fmo1 DM	3	3	10	30
	fmo1 DM	4	1	6	16.6667

## Sheet: Fig. 6F
	Fig. 6F
	genotype	blad	pen	total	%
	fmo1	1	7	59	11.8644	11.1265
	fmo1	2	8	53	15.0943	3.18166
	fmo1	3	4	53	7.54717
	fmo1	4	6	60	10
	fmo1 pen1	1	8	59	13.5593	11.6617
	fmo1 pen1	2	7	60	11.6667	3.56437
	fmo1 pen1	3	4	60	6.66667
	fmo1 pen1	4	9	61	14.7541
	fmo1 syp122	1	6	52	11.5385	12.1354
	fmo1 syp122	2	3	53	5.66038	4.92083
	fmo1 syp122	3	9	52	17.3077
	fmo1 syp122	4	8	57	14.0351
	fmo1 DM	1	94	100	94	93.25
	fmo1 DM	2	93	100	93	1.70783
	fmo1 DM	3	95	100	95
	fmo1 DM	4	91	100	91
