# Supplementary material for: Plant SYP12 syntaxins mediate an evolutionarily conserved general immunity to filamentous pathogens
Source: eLife. 2022 Feb 4;11:e73487. doi: 10.7554/eLife.73487 (PMC8865848; doi:10.7554/eLife.73487)
Supplement: Figure 8—source data 1. [file elife-73487-fig8-data1.xlsx]

## Sheet: Fig. 8C
	Fig. 8C
	genotype	blad	pen	total	%
	Col-0	1	6	104	5.76923	6.80212
	Col-0	2	3	102	2.94118	2.87069
	Col-0	3	9	116	7.75862
	Col-0	4	7	104	6.73077
	Col-0	5	12	111	10.8108
	pen1-1	1	169	232	72.8448	72.8097
	pen1-1	2	167	232	71.9828	5.1159
	pen1-1	3	164	240	68.3333
	pen1-1	4	73	105	69.5238
	pen1-1	5	179	220	81.3636
	DM PEN1	1	21	121	17.3554	13.2584
	DM PEN1	2	13	110	11.8182	3.05021
	DM PEN1	3	13	106	12.2642
	DM PEN1	4	18	118	15.2542
	DM PEN1	5	12	125	9.6
	DM SYP122	1	165	233	70.8155	76.6483
	DM SYP122	2	150	208	72.1154	5.33349
	DM SYP122	3	171	218	78.4404
	DM SYP122	4	158	203	77.8325
	DM SYP122	5	179	213	84.0376
	DM Mp12A	1	146	216	67.5926	80.0621
	DM Mp12A	2	209	243	86.0082	7.85474
	DM Mp12A	3	175	224	78.125
	DM Mp12A	4	190	218	87.156
	DM Mp12A	5	171	210	81.4286
	DM Mp12B	1	189	210	90	93.0485
	DM Mp12B	2	176	185	95.1351	2.34228
	DM Mp12B	3	205	219	93.6073
	DM Mp12B	4	200	210	95.2381
	DM Mp12B	5	188	206	91.2621

## Sheet: Fig. 8F
	Fig. 8F
	genotype	blad	pen	total	%
	Col-0	1	3	57	5.26316	4.5189
	Col-0	2	1	52	1.92308	3.33073
	Col-0	3	5	56	8.92857
	Col-0	4	1	51	1.96078
	fmo DM	1	33	58	56.8966	49.8723
	fmo DM	2	23	54	42.5926	5.84143
	fmo DM	3	26	52	50
	fmo DM	4	27	54	50
	DM PEN1	1	0	56	0	4.23669
	DM PEN1	2	2	51	3.92157	3.11998
	DM PEN1	3	4	56	7.14286
	DM PEN1	4	3	51	5.88235
	DM SYP122	1	2	53	3.77358	4.46812
	DM SYP122	2	1	55	1.81818	2.99709
	DM SYP122	3	2	57	3.50877
	DM SYP122	4	5	57	8.77193
	DM Mp12A	1	0	56	0	5.58869
	DM Mp12A	2	7	62	11.2903	4.79363
	DM Mp12A	3	2	51	3.92157
	DM Mp12A	4	4	56	7.14286
	DM Mp12B	1	17	55	30.9091	28.8804
	DM Mp12B	2	15	56	26.7857	5.39065
	DM Mp12B	3	19	54	35.1852
	DM Mp12B	4	12	53	22.6415
