# Supplementary material for: Plant SYP12 syntaxins mediate an evolutionarily conserved general immunity to filamentous pathogens
Source: eLife journal article supplement (doi:10.7554/elife.73487), 2022-02-04
Supplement: supp [file elife-73487-supp-v1.zip]

## Figure 8-figure supplement 4

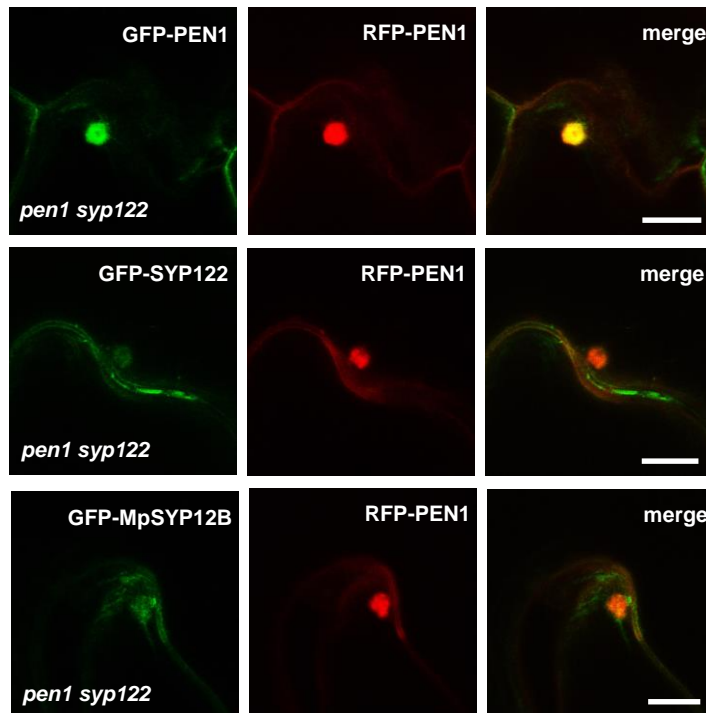

**Figure 8-figure supplement 4. Localization of SYP12 clade members at *Bgh* attack sites.** Comparative papilla localization of SYP12 members from *Arabidopsis* or *Marchantia* in response to attack by *Bgh* in non-penetrated cells. Bars = 10  $\mu$ m.
