# Supplementary material for: Plant SYP12 syntaxins mediate an evolutionarily conserved general immunity to filamentous pathogens
Source: eLife journal article supplement (doi:10.7554/elife.73487), 2022-02-04
Supplement: supp [file elife-73487-supp-v1.zip]

## Figure 8-figure supplement 7

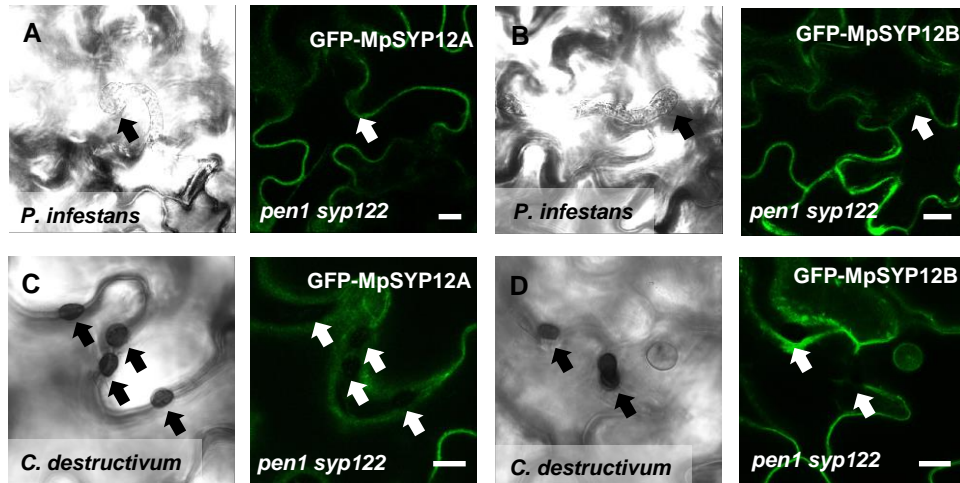

**Figure 8-figure supplement 7. Localization of *Marchantia* SYP12 clade members at attack sites.** (A-D) Localization of GFP-MpSYP12A (A, C) and GFP-MpSYP12B (B, D) in response to attack by *P. infestans* (A-B) and *C. destructivum* (C-D) in non-penetrated cells. Bars = 10  $\mu\text{m}$ .
