# Supplementary material for: Plant SYP12 syntaxins mediate an evolutionarily conserved general immunity to filamentous pathogens
Source: eLife journal article supplement (doi:10.7554/elife.73487), 2022-02-04
Supplement: supp [file elife-73487-supp-v1.zip]

## Figure 3-figure supplement 1

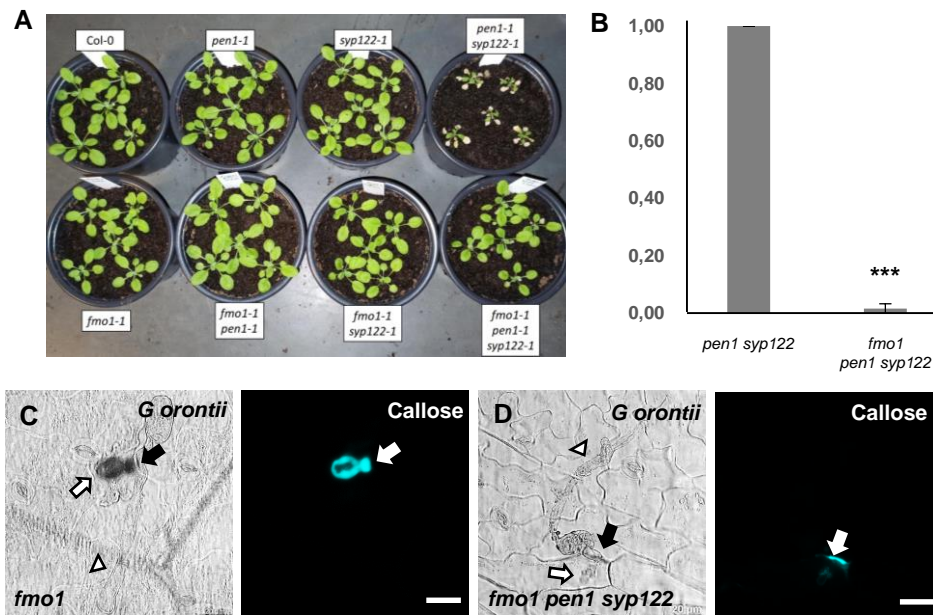

**Figure 3-figure supplement 1. Loss of FMO1 attenuates *pen1 syp122* autoimmunity.** (A) Plants at 4 weeks, showing the growth phenotypes of the mutant lines used in these studies. (B) Relative transcript levels of PR1 in four week old plants. (F) Values are mean  $\pm$ SD (n = 3). \*\*\*,  $P < 0.001$ , Student's t test. (C-D) Accumulation of callose in response to *G. orontii*- (48 h). Open- arrows and arrow heads point to the developing IPS and secondary hyphae, respectively. Bars = 20  $\mu$ m.
