# Supplementary material for: Plant SYP12 syntaxins mediate an evolutionarily conserved general immunity to filamentous pathogens
Source: eLife journal article supplement (doi:10.7554/elife.73487), 2022-02-04
Supplement: supp [file elife-73487-supp-v1.zip]

## Figure 8-figure supplement 6

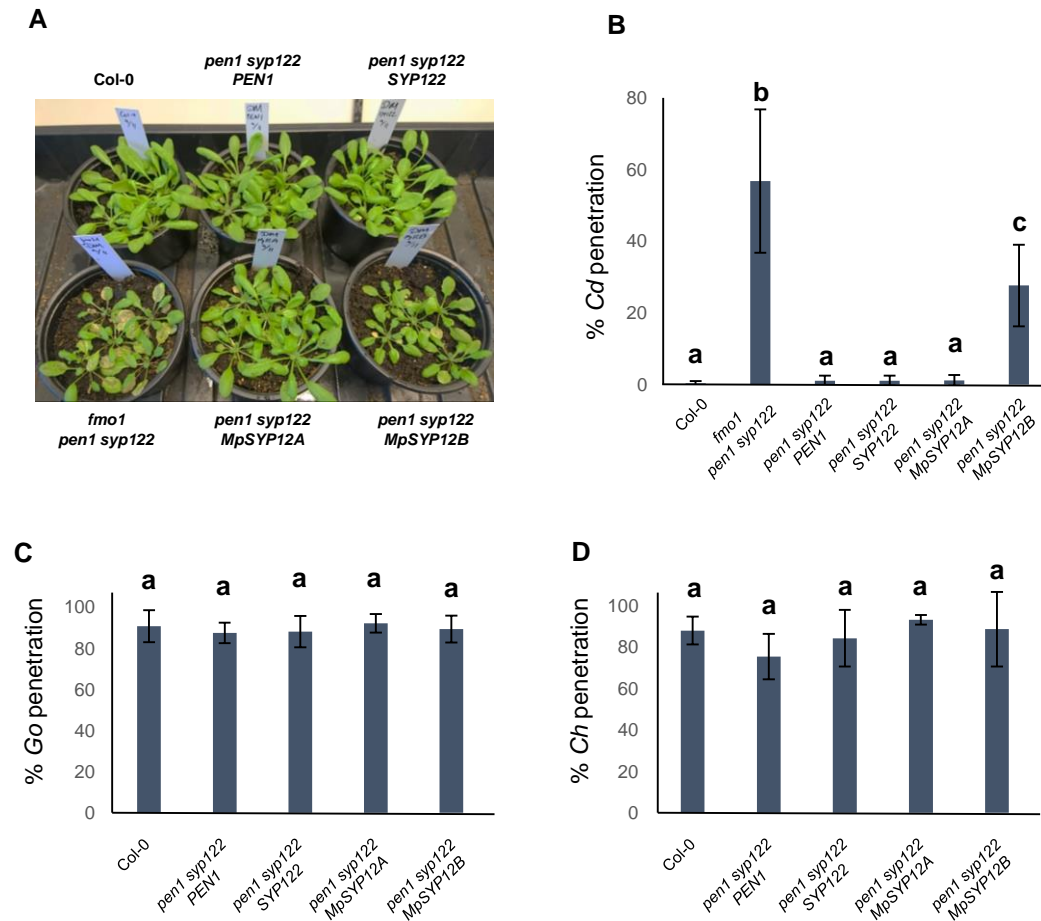

**Figure 8-figure supplement 6. *Marchantia* SYP12s restore immunity in *Arabidopsis* towards *C. destructivum*.** (A) Macroscopic phenotype at 5 dai with *C. destructivum*. (B-D) Frequency of penetration by *C. destructivum* (B), *G. orontii* (C) and *C. higginsianum* (D). (B-D) All values are mean  $\pm$  SD ( $n = 4$  leaves per genotype). Different letters indicate significantly different values at  $P \leq 0.001$  estimated using logistic regression.
