# Supplementary material for: Plant SYP12 syntaxins mediate an evolutionarily conserved general immunity to filamentous pathogens
Source: eLife journal article supplement (doi:10.7554/elife.73487), 2022-02-04
Supplement: supp [file elife-73487-supp-v1.zip]

## Figure 4-figure supplement 1

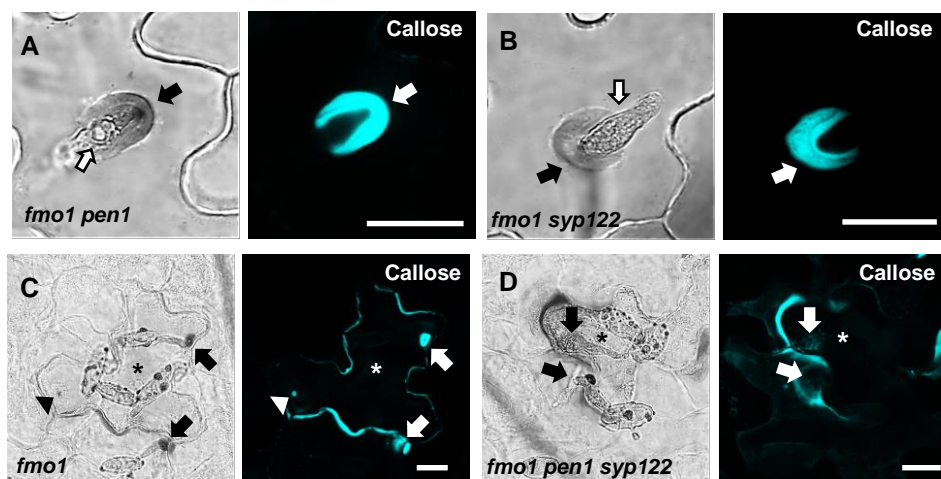

**Figure 4-figure supplement 1. PEN1/SYP122 are required for encasement responses to *Bgh*.** (A-D) Accumulation of callose in response to *Bgh* attack at non-penetrated (arrowheads) and penetrated (arrows) attack sites. Open arrows point to the developing IPS. \* marks cells with cell death response. Bars = 20  $\mu$ m.
