# Supplementary material for: Plant SYP12 syntaxins mediate an evolutionarily conserved general immunity to filamentous pathogens
Source: eLife journal article supplement (doi:10.7554/elife.73487), 2022-02-04
Supplement: supp [file elife-73487-supp-v1.zip]

Figure 5-figure supplement 1

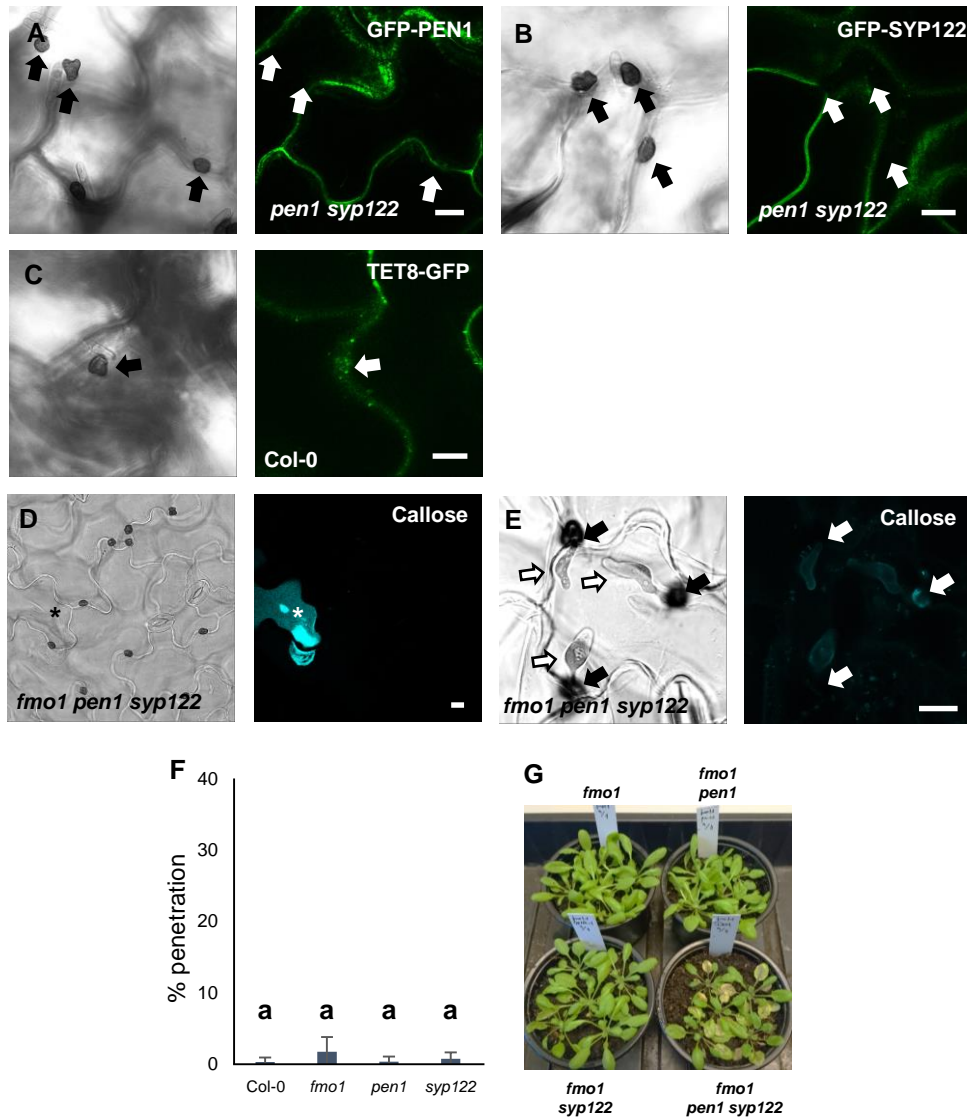

**Figure 5-figure supplement 1. PEN1/SYP122 are required for pre-invasive immunity towards *C. destructivum*.** (A-C) Localisation of GFP-PEN1 (A), GFP-SYP122 (B) and TET8-GFP (C) in response to attack by *C. destructivum*. (D-E) Accumulation of callose in response to attack by *C. destructivum* in (D) non-penetrated cells and (E) at penetration sites (arrows). Open arrows point to the developing IPS. \* marks cell with cell death response. (F) Frequency of penetration by *C. destructivum*. (G) Macroscopic phenotype at 5 dai with *C. destructivum*. Bars = 10  $\mu$ m. (F) All values are mean  $\pm$ SD (n = 4 leaves per genotype). Different letters indicate significantly different values at  $P \leq 0.001$  estimated using logistic regression.
