# Supplementary material for: Plant SYP12 syntaxins mediate an evolutionarily conserved general immunity to filamentous pathogens
Source: eLife journal article supplement (doi:10.7554/elife.73487), 2022-02-04
Supplement: supp [file elife-73487-supp-v1.zip]

## Figure 7-figure supplement 1

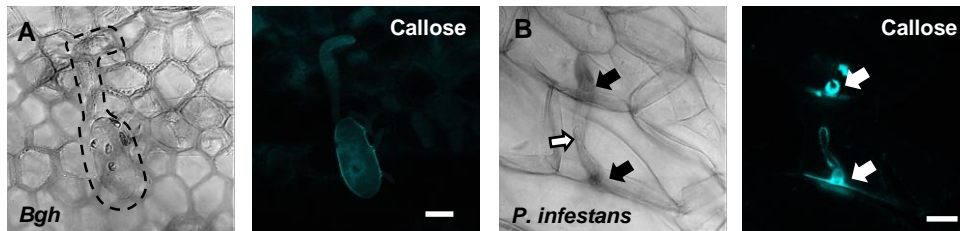

**Figure 7-figure supplement 1. Responses in *Marchantia polymorpha* to filamentous pathogens.** (A) On *M. polymorpha*, spores from *Bgh* (dotted line) were mis-differentiated with no or wrongly orientated appressoria that did not attack the host-cell. (B) Accumulation of callose in *M. polymorpha* in response to attack by *P. infestans* (arrows) in penetrated cells. Open arrow points to the developing IPS. Note that the frequency of *P. infestans* spores that attack a host-cell is very low. Bars=10  $\mu$ m.
