# Supplementary material for: Plant SYP12 syntaxins mediate an evolutionarily conserved general immunity to filamentous pathogens
Source: eLife journal article supplement (doi:10.7554/elife.73487), 2022-02-04
Supplement: supp [file elife-73487-supp-v1.zip]

## Figure 8-figure supplement 3

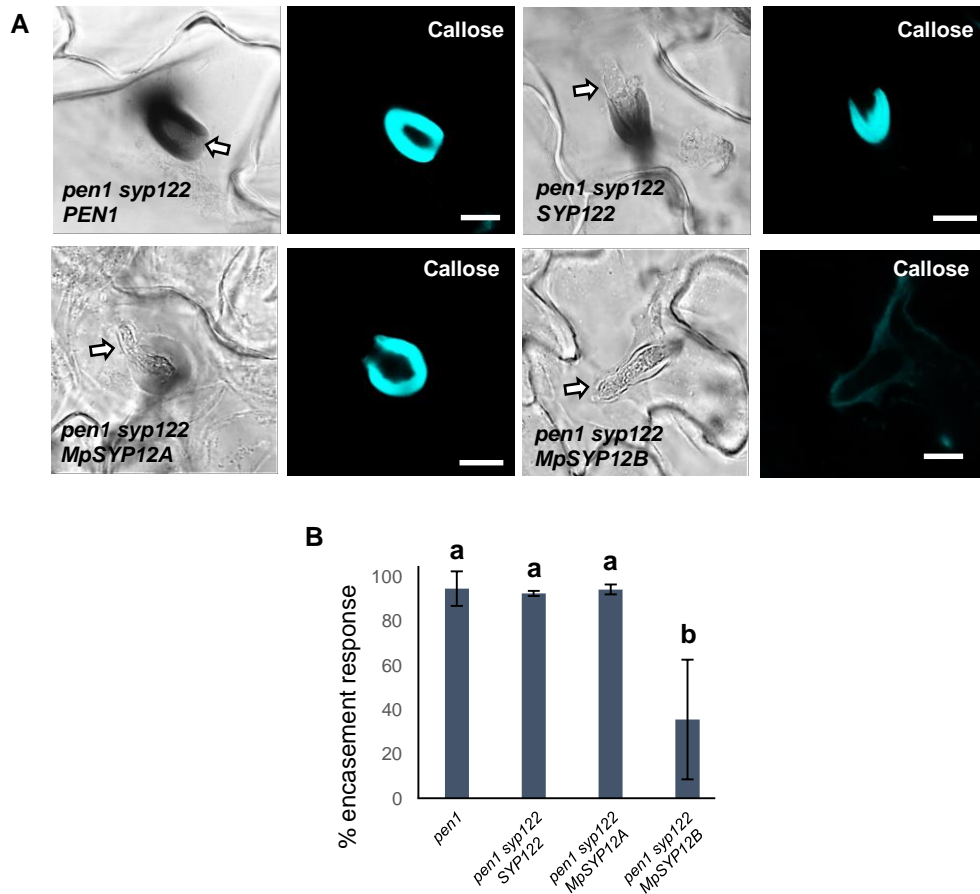

**Figure 8-figure supplement 3. *Marchantia* syntaxins rescue encasement responses.** (A) Accumulation of callose in response to *Bgh* attack at successful penetration sites. Open arrows point to the developing IPS. Bars = 10  $\mu$ m. (B) Frequency of encasements in response to *Bgh* haustoria in penetrated cells. All values are mean  $\pm$ SD (n = 5 leaves per genotype). Different letters indicate significantly different values at  $P \leq 0.001$  estimated using logistic regression.
