# Supplementary material for: Plant SYP12 syntaxins mediate an evolutionarily conserved general immunity to filamentous pathogens
Source: eLife journal article supplement (doi:10.7554/elife.73487), 2022-02-04
Supplement: supp [file elife-73487-supp-v1.zip]

## Figure 8-figure supplement 5

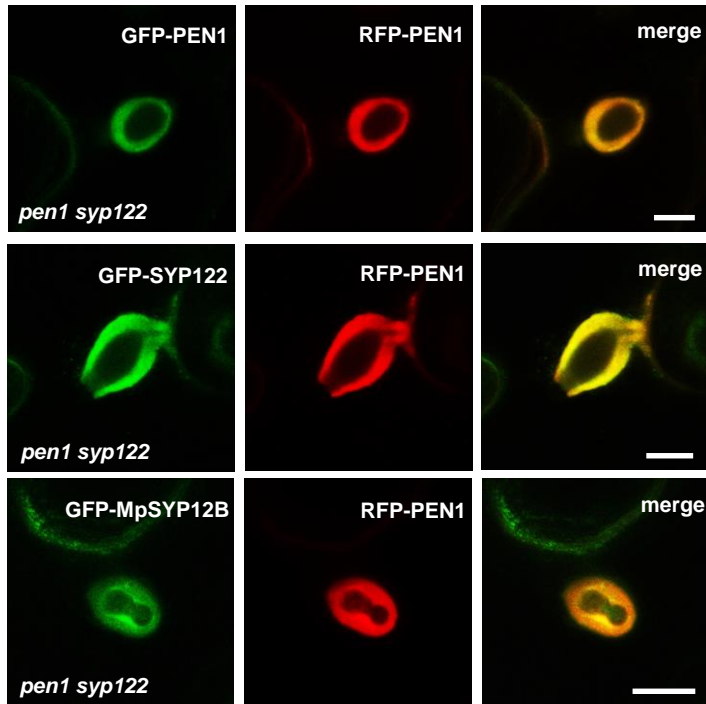

**Figure 8-figure supplement 5. Localization of SYP12**  
**clade members at *Bgh* penetration sites.** Comparative  
encasement localization of SYP12 members from  
*Arabidopsis* or *Marchantia* in response to haustoria by *Bgh* in  
penetrated cells. Bars = 10  $\mu$ m.
