# Supplementary material for: Plant SYP12 syntaxins mediate an evolutionarily conserved general immunity to filamentous pathogens
Source: eLife journal article supplement (doi:10.7554/elife.73487), 2022-02-04
Supplement: supp [file elife-73487-supp-v1.zip]

## Figure 6-figure supplement 1

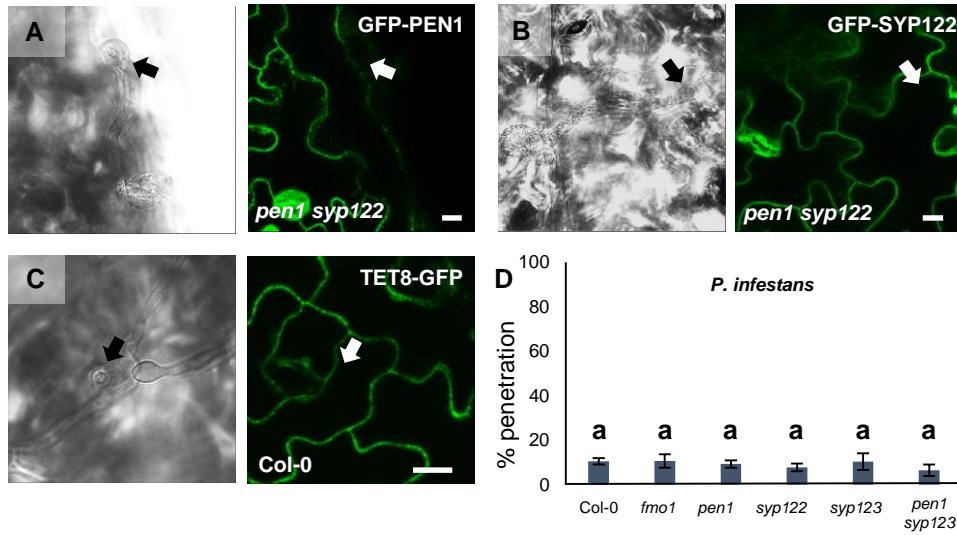

**Figure 6-figure supplement 1. PEN1/SYP122 are required for pre-invasive immunity towards *P. infestans*.** (A-C) Localisation of GFP-PEN1 (A), GFP-SYP122 (B) and TET8-GFP (C) in response to attack by *P. infestans*. (D) Frequency of penetration by *P. infestans*. Bars = 10  $\mu$ m. (D) All values are mean  $\pm$ SD ( $n = 4$  leaves per genotype). Different letters indicate significantly different values at  $P \leq 0.001$  estimated using logistic regression.
