# Supplementary material for: Plant SYP12 syntaxins mediate an evolutionarily conserved general immunity to filamentous pathogens
Source: eLife journal article supplement (doi:10.7554/elife.73487), 2022-02-04
Supplement: supp [file elife-73487-supp-v1.zip]

## Figure 8-figure supplement 1

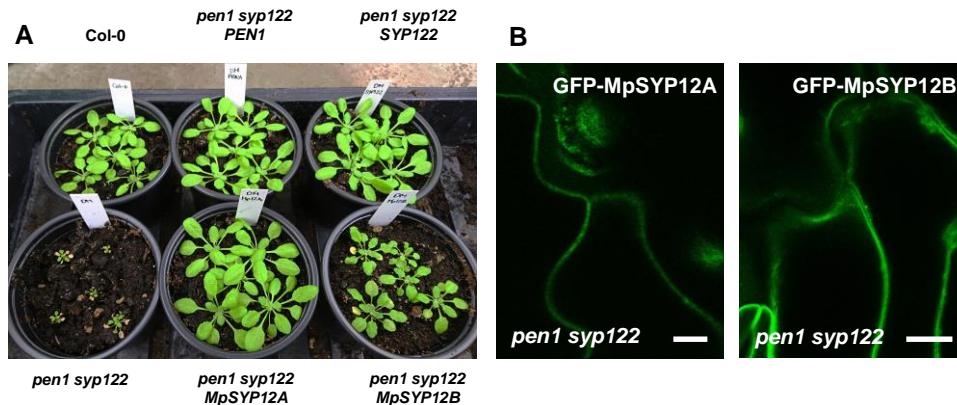

**Figure 8-figure supplement 1. *Marchantia* syntaxins are functional in *Arabidopsis*.** (A) Plants at five weeks, expressing SYP12 clade members from either *Arabidopsis* or *Marchantia polymorpha*. (B) Localization of *Marchantia* SYP12 clade members in the epidermis of leaves from plants of four weeks. Bars=10 μm.
